# Supplementary material for: Mitochondrial Sirt3 contributes to the bone loss caused by aging or estrogen deficiency
Source: PubMed Central journal article supplement (PMC8262324; doi:10.1172/jci.insight.146728), 2021-05-24
Supplement: jciinsight-6-146728-s123.pdf [file jciinsight-6-146728-s123.pdf]

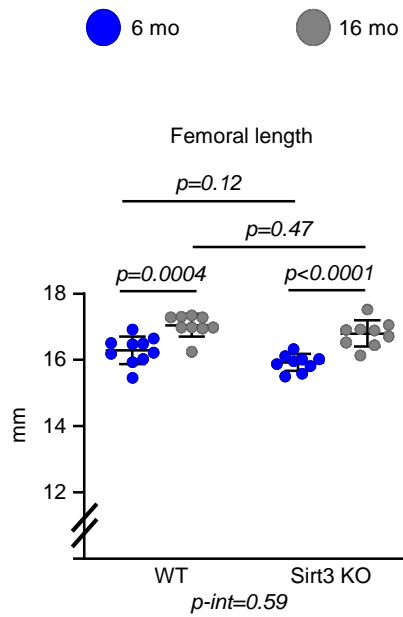

**Supplementary Figure 1. Deletion of Sirt3 does not affect femoral length.**

The graph indicates their femoral lengths in young and aged group. Lines and error bars represent mean  $\pm$  SD. *P* values were determined using 2-way ANOVA. Interaction terms generated by 2-way ANOVA analysis are shown below each graph.

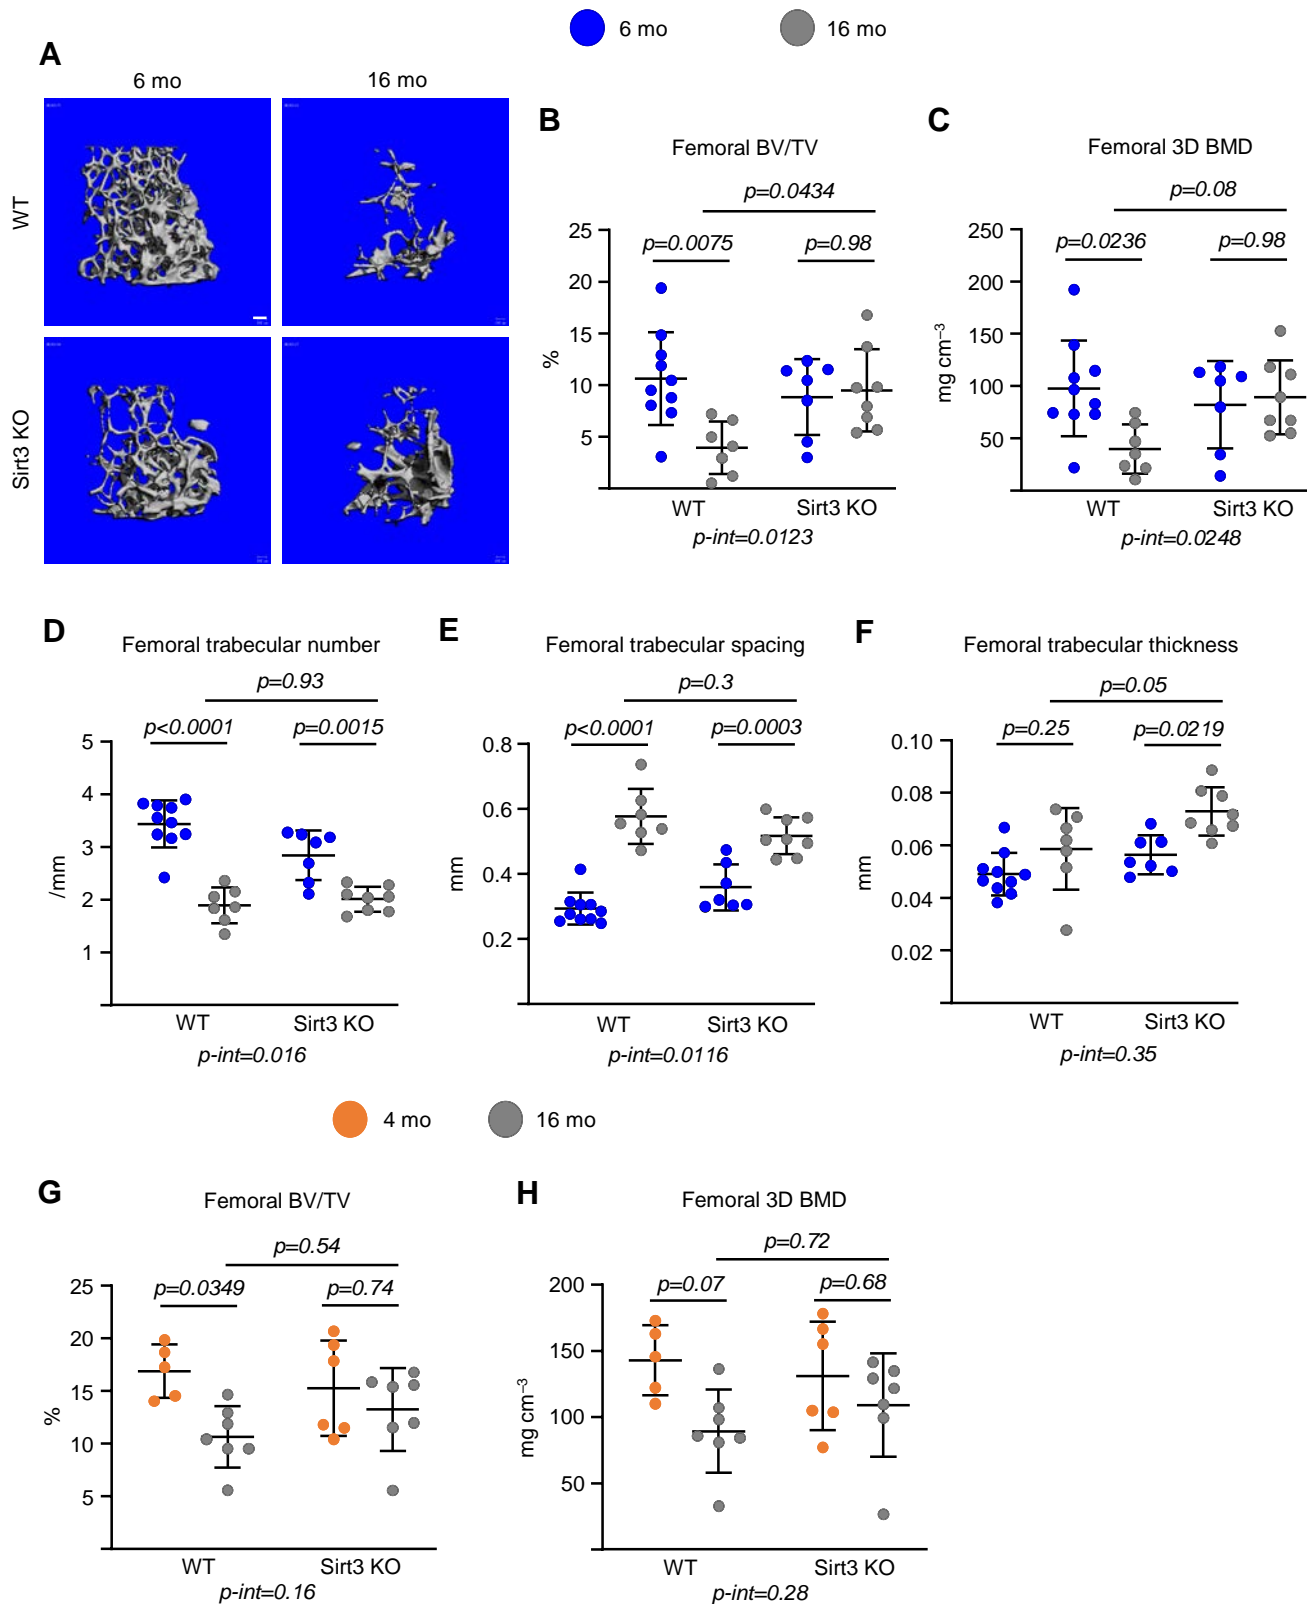

**Supplementary Figure 2. Deletion of Sirt3 prevents age-associated trabecular bone loss at the femur.**

(A–F) Imaging and quantification of femoral bones from female Sirt3 knockout mice and wild-type littermates by micro-CT after sacrifice ( $n = 7\text{--}10$  animals/group). (A) Representative images of trabecular bone (scale bar:  $100\ \mu\text{m}$ ) and (B–F) bone volume per tissue volume (BV/TV), bone mineral density (BMD), and microarchitecture of trabecular bone in femur. (G–H) BV/TV and BMD of trabecular bone in femur from male Sirt3 knockout mice and wild-type littermates by micro-CT ( $n = 5\text{--}7$  animals/group). Lines and error bars represent mean  $\pm$  SD.  $P$  values were determined using 2-way ANOVA. Interaction terms generated by 2-way ANOVA analysis are shown below each graph.

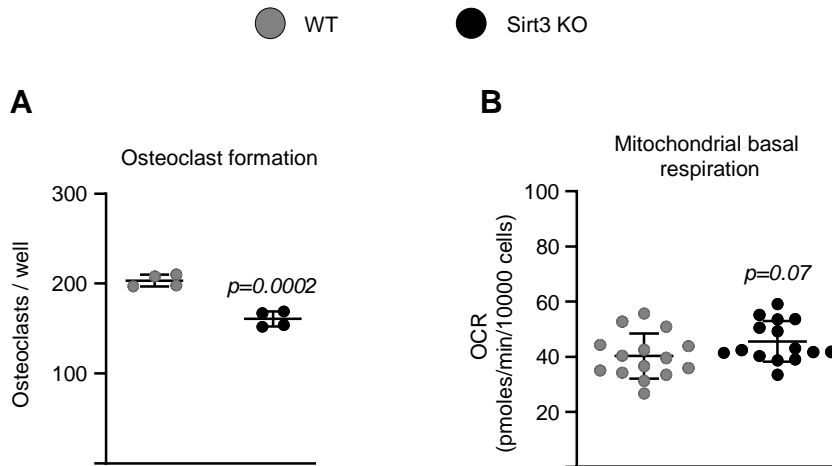

**Supplementary Figure 3. Deletion of Sirt3 does not affect mitochondrial respiration of osteoclasts in young mice.**

BMMs were isolated from 6-month-old female Sirt3 knockout mice and wild-type littermate controls and cultured with M-CSF (30 ng/mL) and RANKL (30 ng/mL) for (A) 5 or (B) 3 days. (A) Number of TRAP-positive multinucleated osteoclasts generated from BMMs (quadruplicates of pooled cultures). (B) Mitochondrial respirations per cell, in osteoclasts, measured by Seahorse ( $n = 15$  wells/group). Lines and error bars represent mean  $\pm$  SD.  $P$  values were determined using Student's  $t$ -test. All measures were performed in cultured BMMs pooled from 4-5 mice/group.

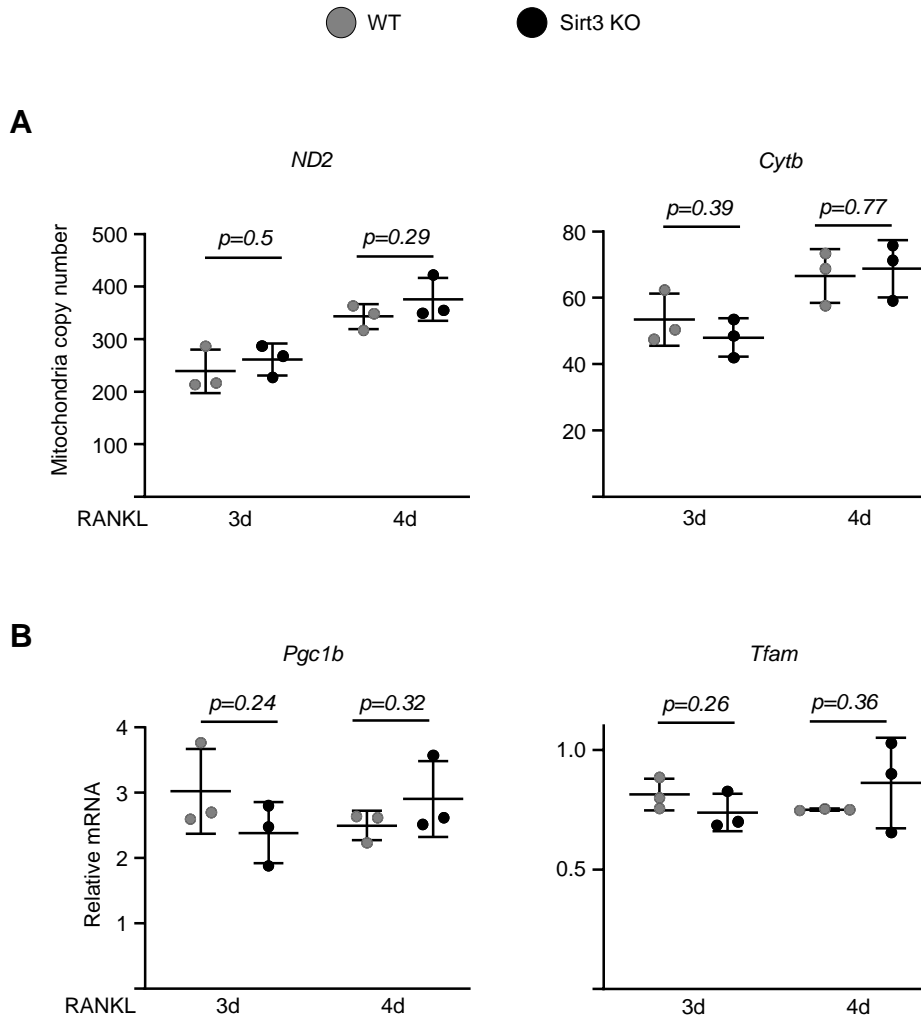

**Supplementary Figure 4. Deletion of Sirt3 does not affect mitochondrial biogenesis of osteoclasts in aged mice.**

BMMs were isolated from 16-month-old female Sirt3 knockout mice and wild-type littermate controls and cultured with M-CSF (30 ng/mL) and RANKL (30 ng/mL) for indicated times. **(A)** Ratio of mitochondrial to nuclear DNA and **(B)** mRNA levels of *Pgc1b* and *Tfam* in osteoclasts measured by qRT-PCR. *P* values were determined using Student's *t*-test. All measures were performed in cultured BMMs pooled from 4-5 mice/group.

● Vehicle      ● LC-0296

**A**

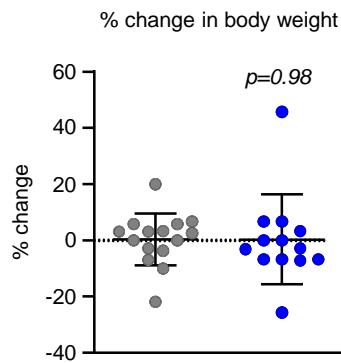

**B**

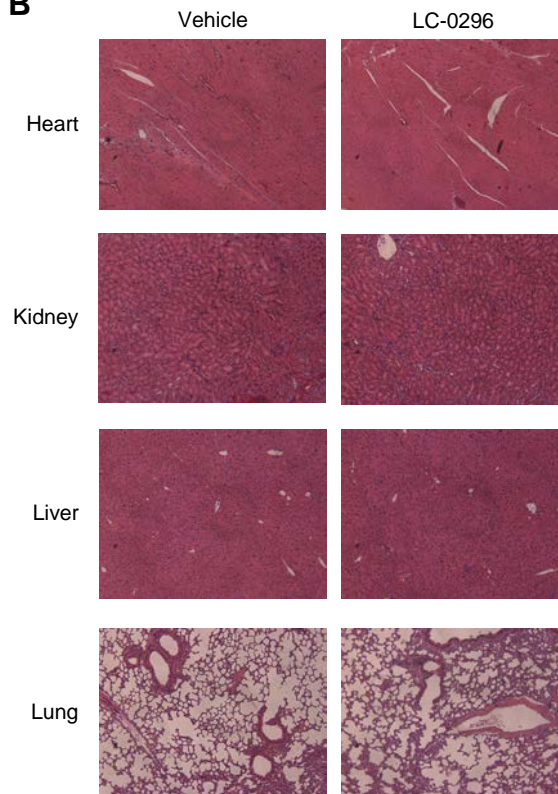

**Supplementary Figure 5. Administration of LC-0296 was not toxic to aging mice.**

LC-0296 was administered (5  $\mu\text{g/g}$  body weight, 100  $\mu\text{L}$ /each i.p. injection) into 12-month-old female C57BL/6 mice for 4 months. **(A)** Percent change in body weight determined 1 day before LC-0296 injection and before sacrifice. **(B)** Representative sections of vital organs from aging mice untreated and treated with LC-0296 following H&E staining as observed under a light microscope (200x). *P* values were determined using Student's *t*-test.

● Vehicle      ● LC-0296

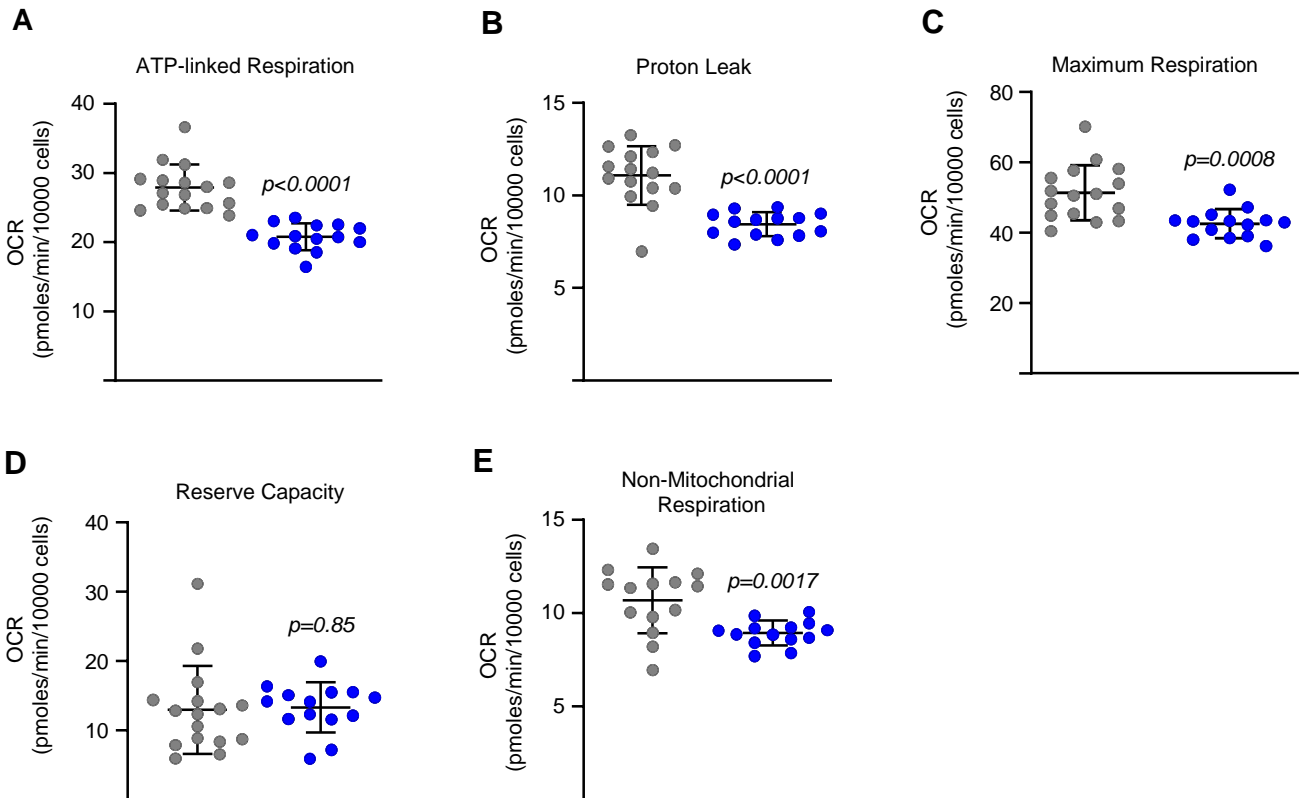

**Supplementary Figure 6. Inhibition of Sirt3 by LC-0296 attenuates mitochondrial and non-mitochondrial respiration in osteoclasts of aging mice.**

(A–E) BMMs were isolated from 16-month-old female C57BL/6 mice and cultured with M-CSF (30 ng/mL) and RANKL (30 ng/mL) for 3 days in the presence or absence of LC-0296 (10 nM). Different fractions of mitochondrial and non-mitochondrial respirations per cell, in osteoclasts, measured by Seahorse ( $n = 14$ – $16$  wells/group). Lines and error bars represent mean  $\pm$  SD.  $P$  values were determined using Student's  $t$ -test.

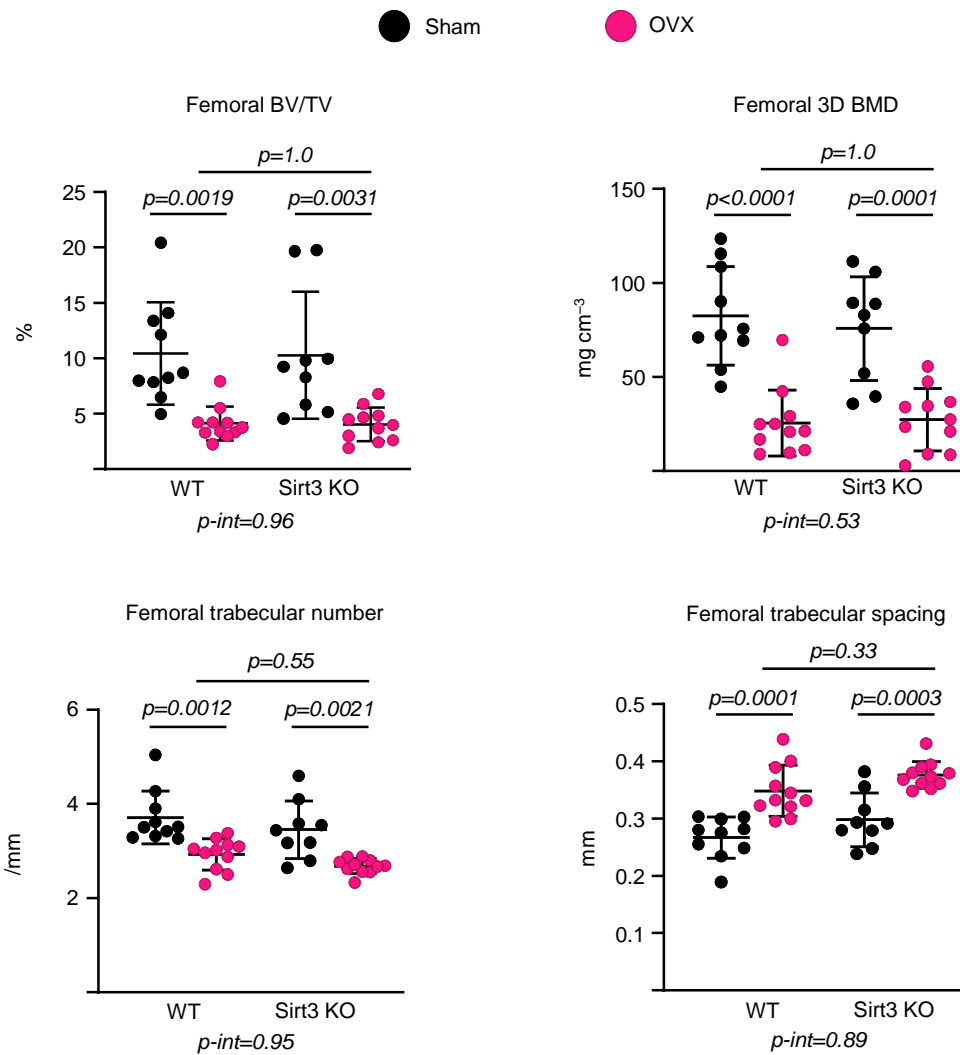

**Supplementary Figure 7. Deletion of Sirt3 does not affect trabecular bone of femur in OVXed mice.**

Five-month-old female Sirt3 knockout mice and wild-type littermate controls were sham-operated or ovariectomized (OVX) for 6 weeks. Bone volume per tissue volume (BV/TV), bone mineral density (BMD), and microarchitecture of trabecular bone in femur by micro-CT ( $n = 9\text{--}11$  animals/group). Lines and error bars represent mean  $\pm$  SD.  $P$  values were determined using 2-way ANOVA. Interaction terms generated by 2-way ANOVA analysis are shown below each graph.

● Sham ● OVX

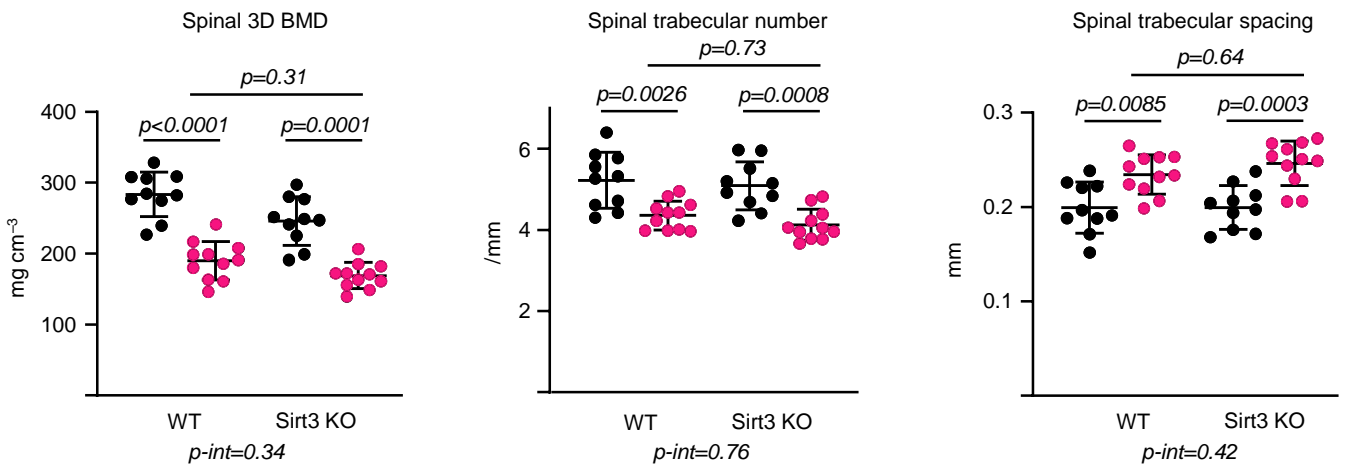

**Supplementary Figure 8. Deletion of Sirt3 does not affect trabecular bone of vertebrae in OVXed mice.**

Bone mineral density (BMD) and microarchitecture of trabecular bone in vertebrae after OVX by micro-CT ( $n = 9\text{--}11$  animals/group). Lines and error bars represent mean  $\pm$  SD.  $P$  values were determined using 2-way ANOVA. Interaction terms generated by 2-way ANOVA analysis are shown below each graph.



● Sham      ● OVX

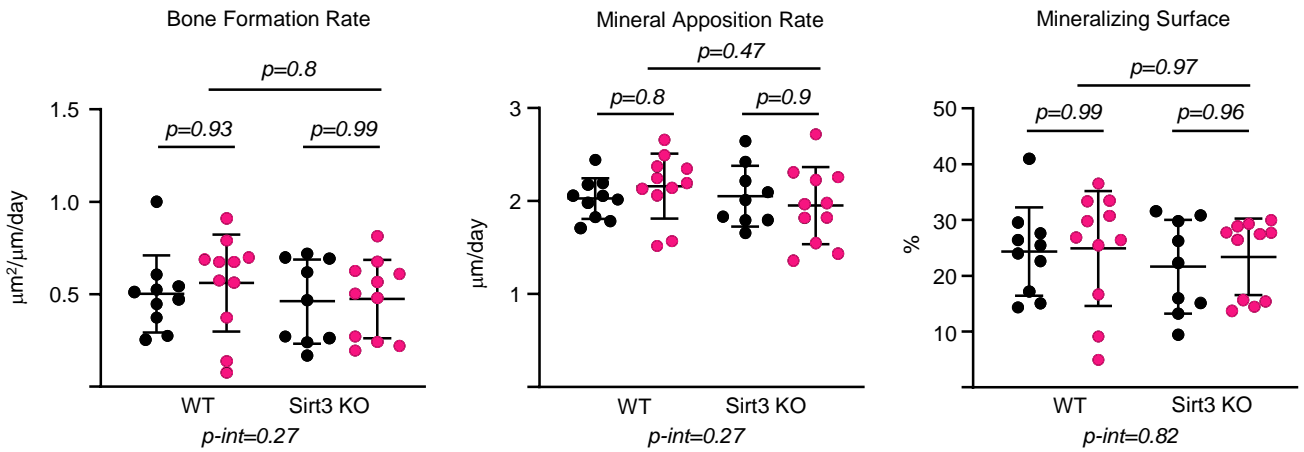

**Supplementary Figure 9. Deletion of Sirt3 does not affect bone formation of femur in OVXed mice.**

Bone formation rate, Mineral apposition rate and mineralizing surface in the endocortical surface of Sirt3 knockout mice and wild-type littermates after OVX (n=9–11 animals/group). Lines and error bars represent mean  $\pm$  SD. *P* values were determined using 2-way ANOVA. Interaction terms generated by 2-way ANOVA analysis are shown below each graph.
